# Supplementary material for: Sensing arbitrary contact forces with a flexible porous dielectric elastomer
Source: Royal Society of Chemistry journal article supplement (doi:10.1039/d0mh01359e), 2020-12-10
Supplement: d0mh01359e1.pdf [file d0mh01359e1.pdf]

## Supporting Information

### **Sensing Arbitrary Contact Forces with a Flexible Porous Dielectric Elastomer**

*Baoqing Nie, Jialei Geng, Ting Yao, Yihui Miao, Yiqiu Zhang, Xinjian Chen\*, Jian Liu\**

Dr. B. Nie, J. Geng, T. Yao, Y. Miao, Prof. X. Chen

School of Electronic and Information Engineering, Soochow University, Suzhou, Jiangsu 215006, China

Y. Zhang, Prof. J. Liu

Institute of Functional Nano and Soft Materials, Jiangsu Key Laboratory for Carbon-Based Functional Materials and Devices, Soochow University, Suzhou, Jiangsu 215123, China. E-mail: [jliu@suda.edu.cn](mailto:jliu@suda.edu.cn)

Prof. X. Chen

State Key Laboratory of Radiation Medicine and Protection, Soochow University, Suzhou 215123, China. E-mail: [xjchen@suda.edu.cn](mailto:xjchen@suda.edu.cn)

## **Detailed Description of the Device Fabrication and Methods**

### **The Electrode Fabrication**

The PDiF device was fabricated by sandwiching a porous elastomer between two textile electrode layers. The patterned electrodes were prepared by a home-made printing procedure. As illustrated in Figure S1a, a piece of cotton with the thickness of 150  $\mu\text{m}$  was covered by a tape layer (50  $\mu\text{m}$  in thickness, 3M). Direct laser machining (VLS 2.30, Universal Laser) was used to cut through the tape layer with a pre-designed geometrical pattern. After the tape in the unwanted areas was peeled off, the rest served as a stencil mask for printing (Figure S1b). Silver paste ink with a volume resistivity of 100  $\text{m}\Omega\cdot\text{mm}$  was applied onto the cotton/tape substrate surface (Figure S1c). Subsequently, a squeegee was used to spread the ink over the surface, and force it into the cotton substrate through the openings of the tape (Figure S1d). The substrate was warmed by a heat gun (SAIKE 852D, power 100 W) for 20 s. After the silver ink was completely dried, the rest tape was removed from the cotton surface, leaving the electrode of cotton/silver ink composite (Figure S1e).

### **Preparation of the Porous Dielectric**

Sodium dodecyl sulfate (SDS, Sigma-Aldrich) and lithium sulfate ( $\text{Li}_2\text{SO}_4$ , Sigma-Aldrich) were mixed into deionized (DI) water (SDS:  $\text{Li}_2\text{SO}_4$ : DI = 1:20:100, w/w). The SDS/ $\text{Li}_2\text{SO}_4$ /DI (SLD) mixture (Figure S2a) was treated by shaking for 20 min in a vortex shaker (VORTEX-5, Kylin-Bell). Next, the as-prepared SLD mixture was separately added to the two components (part A and B) of Ecoflex-0030 (SMOOTH-ON) with a mass ratio of 1:1 under a manual stirring for 5 min (Figure S2b). They were mixed a beaker (1:1, w/w) and thoroughly stirred for another 5 min. The final mixture containing SLD, part A and part B of Ecoflex-300 (abbreviated as the Ecoflex mixture) was de-gassed for 15 min in a vacuum chamber (Figure S2c).

## **Sensor Assembly**

As shown in Figure S2d, two pieces of U-shape acrylic molds were placed on the bottom electrode surface, forming a rectangular ring-shape chamber. The Ecoflex mixture was poured and filled in the chamber, followed by covering the upper electrode layer (Figure S2e, S2f). The sample was cured at room temperature for half an hour, before the removal of the acrylic molds (Figure S2g). Finally, the whole device was placed in a room condition for three days. During this procedure, the component of water was completely evaporated, leaving plenty of pores in the elastomer.

## **Force Measurement and Mathematic Processing**

The performance of the PDiF sensors were evaluated with a customized setup consisting of a dynamometer (M5-05, Mark-10) with a resolution of 1 mN and a linear stage platform (LMS, LTS300/M, Thorlabs Inc.) with a resolution of 1  $\mu\text{m}$ . The setup can control and monitor mechanical loads and displacements simultaneously. To apply a uniform normal force on each unit of the PDiF sensor, an acrylic sheet with a thickness of 1 mm was glued with the sensor. The normal force was directly applied on the sheet surface. For the calibrations on the tangential responses, a force in the direction parallel to the sensor surface was applied to the acrylic sheet. The experimental setup was illustrated in Figure S3 for the calibrations on a force with an arbitrary direction. A weight was placed on the sheet surface, serving as the normal load. The acrylic sheet was cut into polygon shape with specific angles, in which the force gauge can generate a parallel force with a designed in-plane angle. The corresponding capacitance change in each sensing unit was measured by a LCR meter (WK 65120B) or a customized circuit at an AC excitation voltage of 1 V and a frequency of 10 kHz.

The consents of all volunteers have been obtained for participations in all the experiments.

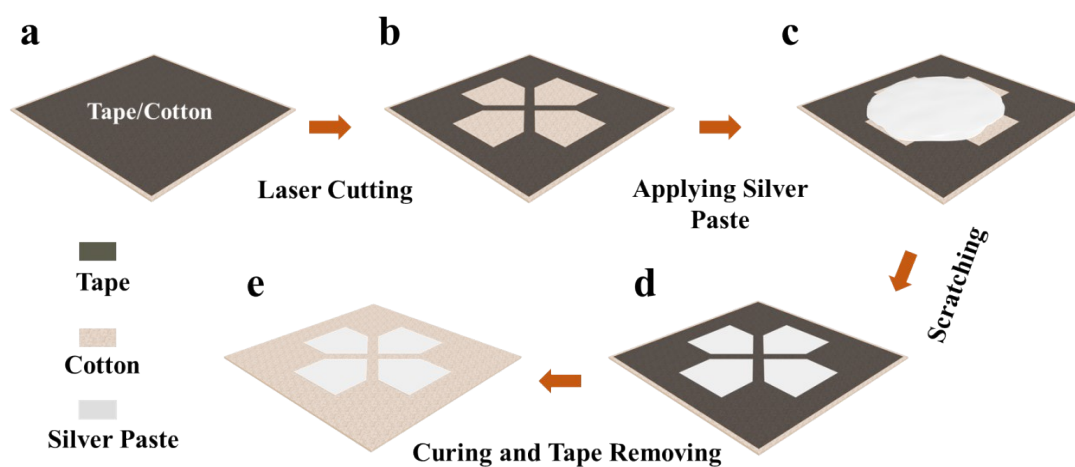

**Figure S1** Electrode Fabrication. (a) Laminate a layer of one-side tape on the cotton substrate. (b) Laser cut on the tape layer to define the geometrical patterns. (c) Apply silver paste on the surface of the substrate. (d) Squeegee the silver paste into the patterns of the tape layer. (e) Solidify the silver paste and remove the tape on the substrate.

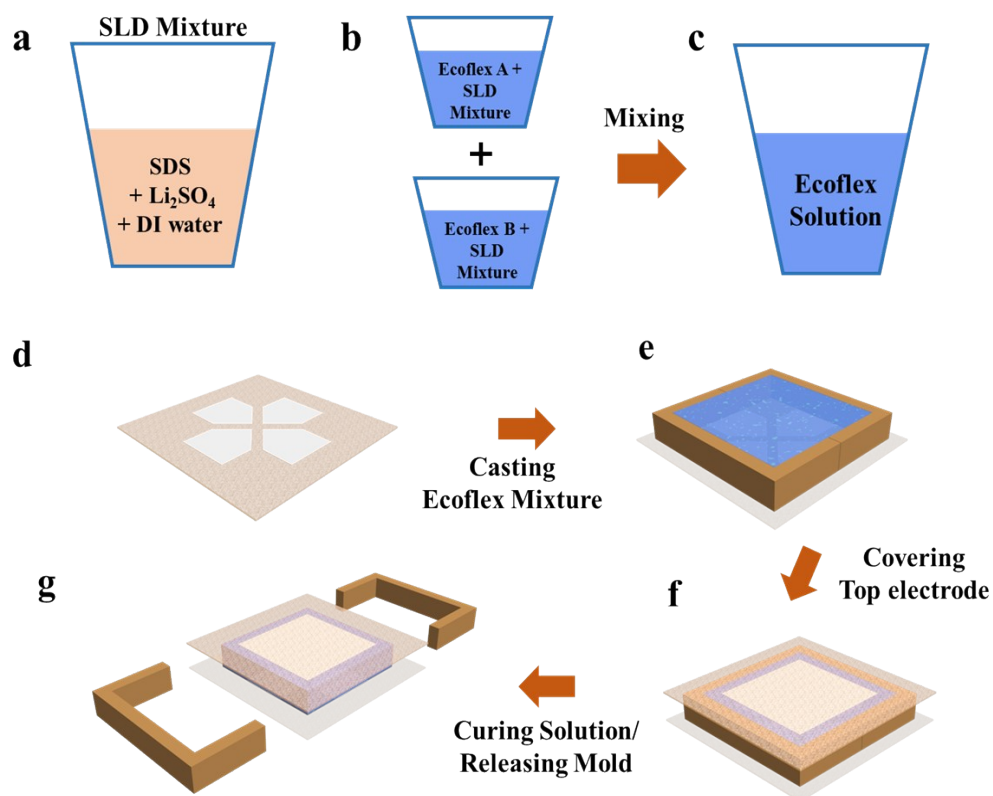

**Figure S2** Device Fabrication. (a) Prepare the SLD solution by mixing SDS,  $\text{Li}_2\text{SO}_4$  and DI water at a mass ratio of 1:20:100. (b-c) Prepare the Ecoflex mixture by adding the SLD solution into the two components (part A and part B) of Ecoflex separately, and mixing them together. (d-e) Cast the Ecoflex mixture into a molded reservoir on the electrode surface. (f) Cover the top electrode layer on the Ecoflex solution. (g) Solidify the Ecoflex mixture and release the mold of the reservoir.

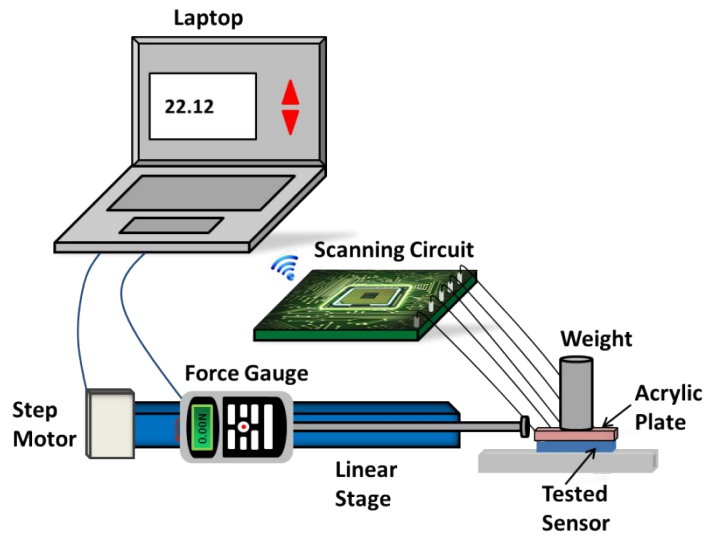

**Figure S3** Schematic illustration on the experimental setup of the device characterization on the force in an arbitrary direction.

## The Relationship of Capacitive Outputs and Three-Dimensional Forces

We have developed a coefficient matrix  $A$  to investigate the transduction principle between the spatial forces and the capacitance outputs. The relative capacitance changes,  $\Delta C_1/C_1^0$ ,  $\Delta C_2/C_2^0$ ,  $\Delta C_3/C_3^0$ ,  $\Delta C_4/C_4^0$ , and the force components,  $F_x$ ,  $F_y$ ,  $F_z$ , follow Equation (2).

The coefficient matrix  $A$  is expressed as:

$$A = \begin{bmatrix} \alpha_{11} & \alpha_{12} & \alpha_{13} & \beta_{11} & \beta_{12} & \gamma_{11} & \gamma_{12} \\ \alpha_{21} & \alpha_{22} & \alpha_{23} & \beta_{21} & \beta_{22} & \gamma_{21} & \gamma_{22} \\ \alpha_{31} & \alpha_{32} & \alpha_{33} & \beta_{31} & \beta_{32} & \gamma_{31} & \gamma_{32} \\ \alpha_{41} & \alpha_{42} & \alpha_{43} & \beta_{41} & \beta_{42} & \gamma_{41} & \gamma_{42} \end{bmatrix} \quad (S1)$$

where the coefficients,  $\alpha_{ij}$  ( $i = 1, 2, 3$  or  $4$  and  $j = 1, 2$  or  $3$ ) represent the linear relationship between relative capacitance changes and the three force components. In addition, due to the presence of the porous structure, the inputs and outputs show a nonlinear relationship, governed by  $\beta_{ij}$  and  $\gamma_{ij}$ .

According to the experimental measurements of ( $\Delta C_1/C_1^0$ ,  $\Delta C_2/C_2^0$ ,  $\Delta C_3/C_3^0$ ,  $\Delta C_4/C_4^0$ ,  $F_x$ ,  $F_y$ ,  $F_z$ ) with a total number of  $n = 167$ , we have determined the coefficients of  $\alpha_{ij}$ ,  $\beta_{ij}$  and  $\gamma_{ij}$  by using least squares algorithm. Equation (3) gives the coefficient matrix and Figure S4 compares the experimental data (blue dots) and fitted values (red dots) calculated from Equations (4-6). The root mean squared error is 0.033 between the experiment and fitted data.

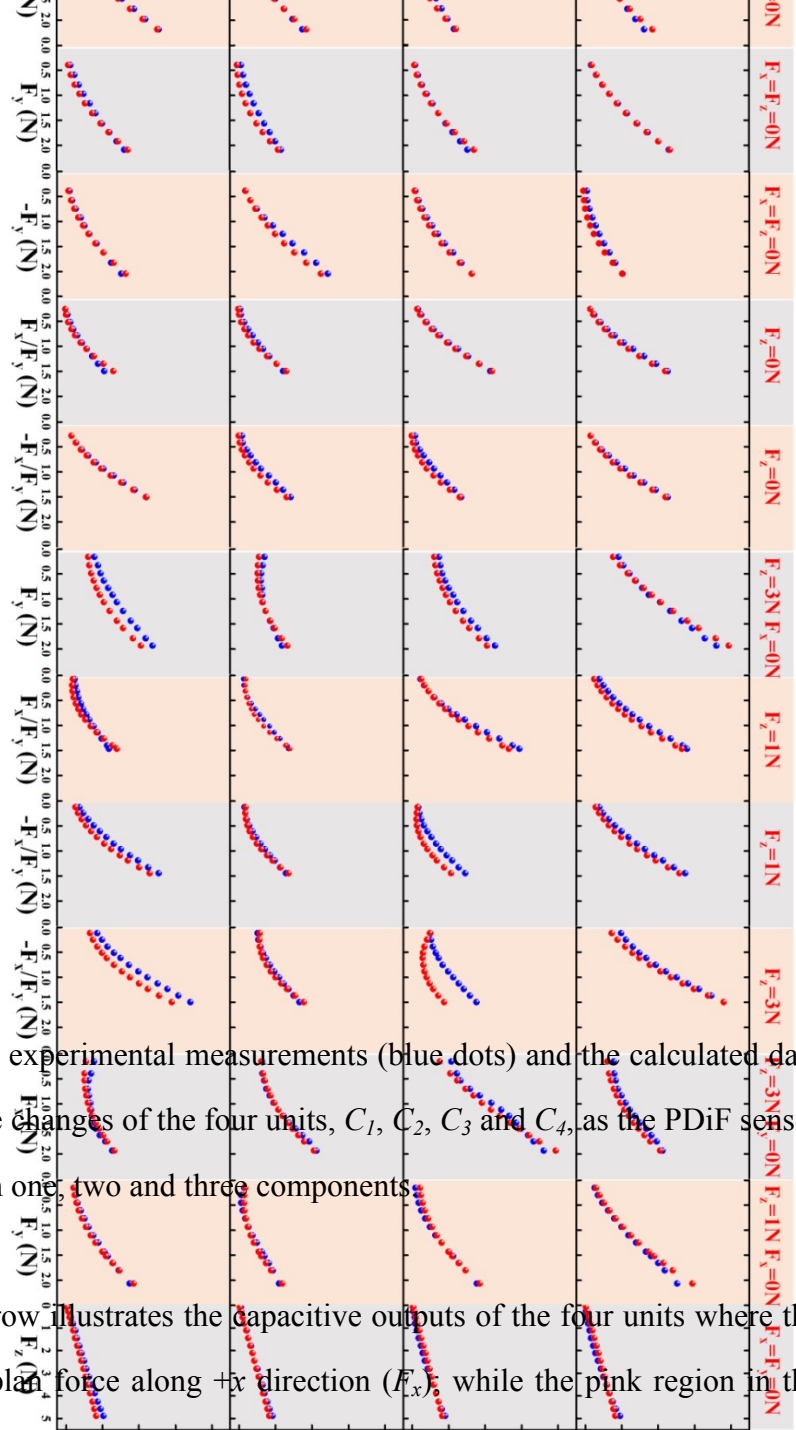

**Figure S4** Comparison between the experimental measurements (blue dots) and the calculated data (red dots) of the relative capacitance changes of the four units,  $C_1$ ,  $C_2$ ,  $C_3$  and  $C_4$ , as the PDiF sensor experiences with external loads with one, two and three components.

Notes: The grey region in the first row illustrates the capacitive outputs of the four units where the sensor is loaded with only one in-plan force along +x direction ( $F_x$ ), while the pink region in the second row illustrates the capacitive outputs of the four units where the sensor is loaded with only one in-plan opposite force along -x direction ( $F_x$ ). Interestingly, the pattern of the capacitance changes of  $C_2$  in the first row is similar to that of  $C_4$  in the second row, suggesting a high reproducibility of the units in force measurements. For more examples, the grey region in the 5<sup>th</sup> row gives the four capacitive increments as the PDiF sensor is taken an in-plane force with two components ( $F_x$  and  $F_y$  in equal magnitude); the grey region in the 9<sup>th</sup> row is the three component scenario where capacitances increase against an in-plane force in -x and +y directions complexed with a normal force ( $F_z$ ) of 1N.



## Mechanical and Dielectric Properties of the Porous Ecoflex Elastomer

Figure S5a illustrates the stress-strain curves of the solid and porous Ecoflex elastomers. The elastic modulus of porous elastomer is 33 kPa in the strain range of 0-10%, which is 5.5 times smaller than that of bulk elastomer. As the compression excess 10 %, a portion of pores can be closed, thus allowing the elastic modulus to increase to about 94 kPa. In addition, we have investigated the permittivity changes of the porous elastomer by sweeping the excitation frequency. Figure S5b shows the relative permittivity ( $\epsilon_r$ ) varies along with the excitation frequency ranging from 200 Hz to 1 M Hz under different levels of compression strain. The elastomer shows a similar trend on the dielectric decrease under different compression strains. The dielectric constant decreases by around 13.5% as the elastomer is compressed from 0 to 20 %.

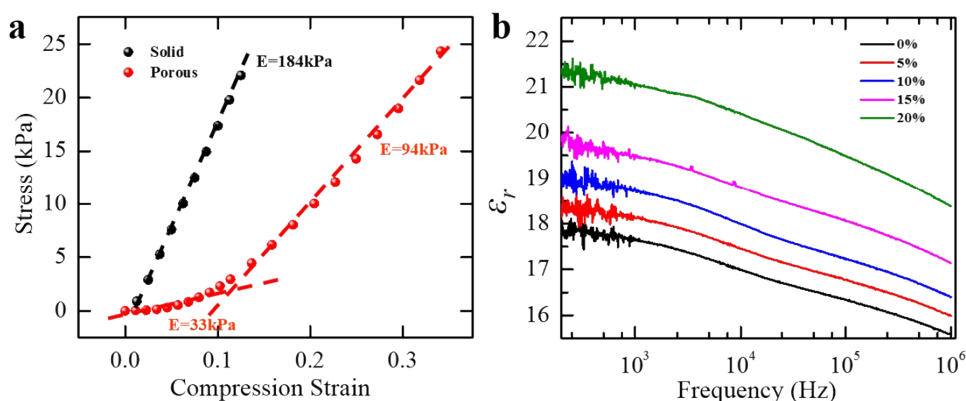

**Figure S5** (a) Stress-strain curves of solid and porous Ecoflex elastomers. (b) Relative permittivity variations of the porous elastomer by sweeping the excitation frequencies under different levels of compression strains.

## PDiF Sensor for Hand-Writing Recognitions

To extend the potential applications, our sensor has been used in hand-writing recognitions. More hand-writing letters are reconstructed by the PDiF-based “electronic pen”. In Figure S6, both the uppercase and lowercase letters of “s”, “u”, “d” and “a” have been reconstructed (blue dots) by using the tracking algorithm to translate these capacitive values  $C_x$  and  $C_y$  into the corresponding coordinates. Meanwhile, the force intensity variations are presented by the dark dots.

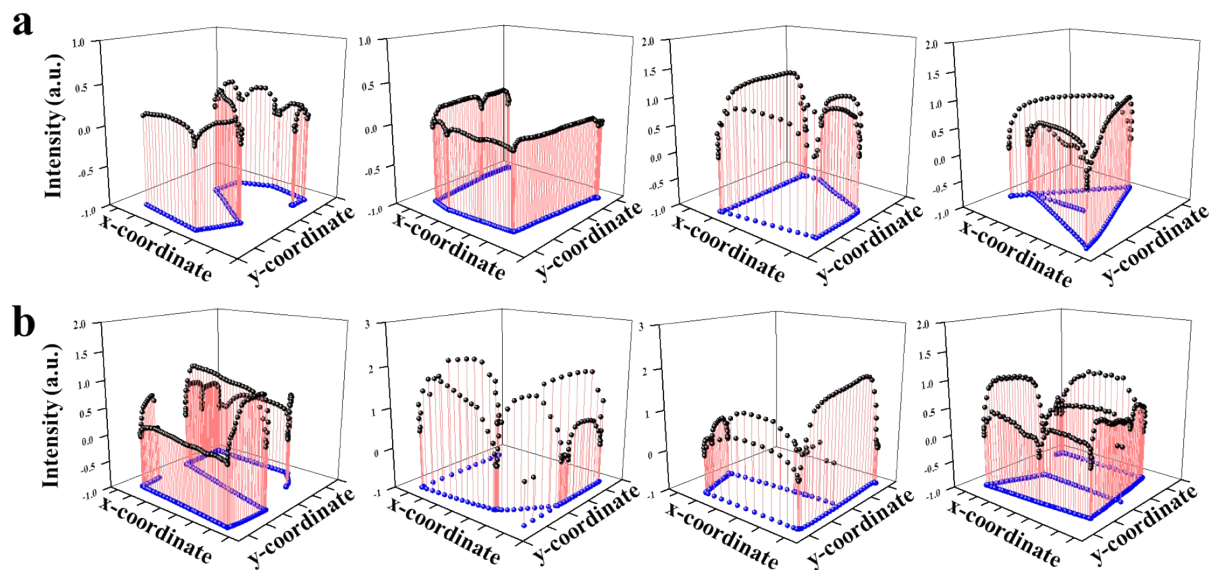

**Figure S6** Demonstration of the PDiF sensor for hand-writing recognition. Writing and reconstructing in-plane upper-case (a) and lower-case (b) letters of “s”, “u”, “d” and “a” (blue dots), along with the corresponding variations of force intensity (dark dots).

**Table S1** Comparison on the designs/features between the reports in the literature and our work

| Ref                                                         | Sensing Mechanism | Sensing Materials                        | Features on Conductive /Dielectric Layer | Mode I Decoupling                         | Mode II Decoupling |
|-------------------------------------------------------------|-------------------|------------------------------------------|------------------------------------------|-------------------------------------------|--------------------|
| H.K Lee et al, 2008<br><i>J Microelectromech Syst</i>       | Capacitive        | Air                                      | -                                        | Nor or Tan separately                     | No                 |
| M.Y. Cheng et al, 2010<br><i>Sensors</i>                    | Capacitive        | Air                                      | -                                        | Nor or Tan separately                     | No                 |
| H.K. Lee et al, 2011<br><i>J Micromech Microeng</i>         | Capacitive        | Air                                      | -                                        | Nor or Tan separately                     | No                 |
| J.A. Dobrzynska et al, 2013<br><i>J. Micromech Microeng</i> | Capacitive        | PDMS                                     | Solid                                    | Nor or Tan separately                     | No                 |
| L. Viry et al, 2014<br><i>Adv Mater</i>                     | Capacitive        | Air/solid fluorosilicone                 | Two layer stacked                        | Nor or Tan separately                     | No                 |
| G. Liang et al, 2015<br><i>J Microelectromech S</i>         | Capacitive        | PDMS                                     | Micro-texture on elastomer surface       | Nor or Tan separately and combinatorially | Yes                |
| Y. Song et al, 2018<br><i>Micromachines</i>                 | Resistive         | Conductive rubber                        | N-shape pillars                          | Nor or Tan separately and combinatorially | Yes                |
| J. Yang et al, 2020<br><i>Adv Funct Mater</i>               | Capacitive        | Liquid metal/Ecoflex                     | Porous                                   | Nor                                       | -                  |
| C. Lu et al, 2018<br><i>Sens Actuator A: Phys</i>           | Resistive         | CNT/PDMS                                 | Microstructured surface                  | Nor                                       | -                  |
| C. Pang et al, 2012<br><i>Nat Mater</i>                     | Resistive         | Pt-coated /PUA                           | Interlocked nanohairs as bulk            | Nor or Tan separately                     | No                 |
| C. Mu et al, 2018<br><i>Adv Funct Mater</i>                 | Resistive         | Graphene oxide/PDMS                      | Porous elastomer                         | Nor or Tan separately                     | No                 |
| <b>Our Work</b>                                             | Capacitive        | Li <sub>2</sub> SO <sub>4</sub> /Ecoflex | Porous elastomer                         | Nor or Tan separately and combinatorially | Yes                |

**Abbreviations:**

PUA: polyurethane acrylate

PDMS: polydimethylsiloxane

CNT: carbon nanotube

Nor: normal

Tan: tangential
